# Supplementary material for: Beta conformation of polyglutamine track revealed by a crystal structure of Huntingtin N-terminal region with insertion of three histidine residues
Source: PubMed Central journal article supplement — Prion. 2013 Jan 31;7(3):221–8. doi: 10.4161/pri.23807 (PMC3783107; doi:10.4161/pri.23807), 2013-01-31
Supplement: prio-7-221-s01.pdf [file prio-7-221-s01.pdf]

## **Supplemental Material to:**

**Meewhi Kim**

**Beta conformation of polyglutamine track revealed by a  
crystal structure of Huntingtin amino-terminal region with  
insertion of three histidine residues**

**Prion 2013; 7(3)**

**<http://dx.doi.org/10.4161/pri.23807>**

**<http://www.landesbioscience.com/journals/prion/article/23807/>**

**Supplementary Table 1. Results of MBP-HttPolyQ-EX1 crystallization trials.**

Htt containing polyQ tracks of various length (17Q, 23Q, 36Q and 45Q) synthesized by GenScript, expressed and purified for crystallization. The crystallization of MBP-HttPolyQ-EX1 with XQXQX interrupters (X = G, A, H) introduced after 7<sup>th</sup>, 9<sup>th</sup>, 10<sup>th</sup>, 12<sup>th</sup>, and 15<sup>th</sup> glutamine residue within a polyQ region are summarized in the additional file1-Table 1.

| XQXQX | First X at | 17Q | 23Q | 36Q | 45Q |
|-------|------------|-----|-----|-----|-----|
| AQAQA | 7          | ▲ ■ | ▲   | X   | X   |
|       | 10         | X   | X   | X   | X   |
| GQGQG | 7          | X   | X   | X   | X   |
| HQHQH | 7          | ▲   | ▲   | ▲ ■ | X   |
|       | 9          | X   | X   | X   | X   |
|       | 12         | NT  | NT  | X   | X   |
|       | 15         | NT  | NT  | X   | X   |

X = No crystal, ▲ =crystal, ■ =diffraction > 3A, NT = Not tested,

**Supplementary Table 2 CC correlation coefficients : Electron density Map (2Fo-Fc) to Htt36Q3H Model fit**

| RESIDUE | x1   |      |      |      | x2   |      |      |      |
|---------|------|------|------|------|------|------|------|------|
|         | A    | B    | C1   | C2   | A    | B    | C1   | C2   |
| MET 371 | 0.94 | 0.94 | 0.93 | 0.92 | 0.93 | 0.94 | 0.95 | 0.93 |
| ALA 372 | 0.95 | 0.95 | 0.95 | 0.97 | 0.95 | 0.96 | 0.96 | 0.96 |
| THR 373 | 0.95 | 0.92 | 0.93 | 0.94 | 0.93 | 0.92 | 0.96 | 0.96 |
| LEU 374 | 0.97 | 0.96 | 0.97 | 0.97 | 0.95 | 0.98 | 0.96 | 0.97 |
| GLU 375 | 0.97 | 0.97 | 0.98 | 0.98 | 0.96 | 0.98 | 0.97 | 0.98 |
| LYS 376 | 0.92 | 0.98 | 0.96 | 0.97 | 0.96 | 0.98 | 0.96 | 0.99 |
| LEU 377 | 0.97 | 0.98 | 0.98 | 0.98 | 0.95 | 0.98 | 0.97 | 0.98 |
| MET 378 | 0.96 | 0.96 | 0.98 | 0.98 | 0.97 | 0.98 | 0.97 | 0.98 |
| LYS 379 | 0.98 | 0.95 | 0.99 | 0.98 | 0.98 | 0.98 | 0.98 | 0.98 |
| ALA 380 | 0.97 | 0.96 | 0.97 | 0.98 | 0.97 | 0.97 | 0.93 | 0.97 |
| PHE 381 | 0.97 | 0.98 | 0.98 | 0.98 | 0.97 | 0.96 | 0.96 | 0.97 |
| GLU 382 | 0.96 | 0.97 | 0.98 | 0.98 | 0.97 | 0.94 | 0.99 | 0.97 |
| SER 383 | 0.94 | 0.93 | 0.93 | 0.97 | 0.90 | 0.95 | 0.93 | 0.95 |
| LEU 384 | 0.98 | 0.98 | 0.98 | 0.99 | 0.97 | 0.98 | 0.97 | 0.97 |
| LYS 385 | 0.97 | 0.97 | 0.98 | 0.99 | 0.95 | 0.96 | 0.98 | 0.98 |
| SER 386 | 0.98 | 0.97 | 0.99 | 0.99 | 0.98 | 0.98 | 0.97 | 0.98 |
| PHE 387 | 0.98 | 0.97 | 0.97 | 0.98 | 0.97 | 0.96 | 0.95 | 0.97 |
| GLN 388 | 0.96 | 0.96 | 0.98 | 0.99 | 0.97 | 0.95 | 0.97 | 0.95 |
| GLN 389 | 0.99 | 0.96 | 0.99 | 0.98 | 0.98 | 0.98 | 0.98 | 0.90 |
| GLN 390 | 0.93 | 0.96 | 0.96 | 0.96 | 0.97 | 0.97 | 0.93 | 0.89 |
| GLN 391 | 0.97 | 0.96 | 0.98 | 0.97 | 0.99 | 0.97 | 0.97 | 0.96 |
| GLN 392 | 0.95 | 0.94 | 0.99 | 0.93 | 0.94 | 0.99 | 0.99 | 0.93 |
| GLN 393 | 0.89 | 0.90 | 0.96 | 0.71 | 0.97 | 0.99 | 0.96 | 0.89 |
| GLN 394 | 0.95 | 0.86 | 0.98 | 0.77 | 0.95 | 0.98 | 0.95 | 0.77 |
| HIS 395 | 0.84 | 0.91 | 0.89 | 0.80 | 0.67 | 0.88 | 0.90 | 0.74 |
| GLN 396 | 0.94 | 0.87 | 0.99 | 0.60 | 0.97 | 0.71 | 0.97 | 0.73 |
| HIS 397 | 0.91 | 0.86 | 0.83 | 0.86 | 0.99 | 0.76 | 0.80 | 0.48 |
| GLN 398 | 0.86 | 0.63 | 0.97 | 0.28 | 0.73 | 0.92 | 0.56 | 0.61 |
| HIS 399 | 0.88 | 0.66 | 0.98 | 0.92 | 0.83 | 0.86 | 0.50 | 0.80 |
| GLN 400 | 0.92 | 0.96 | 0.96 | 0.96 | 0.94 | 0.79 | 0.62 | 0.72 |
| GLN 401 | 0.90 | 0.95 | 0.95 | 0.81 | 0.59 | 0.87 | 0.71 | 0.63 |
| GLN 402 | 0.94 | 0.78 | 0.97 | 0.87 | 0.47 | 0.41 | 0.88 | 0.45 |
| GLN 403 |      |      | 0.98 |      |      |      | 0.82 |      |
| GLN 404 |      |      | 0.98 |      |      |      | 0.83 |      |
| GLN 405 |      |      | 0.97 |      |      |      | 0.83 |      |
| GLN 406 |      |      | 0.97 |      |      |      | 0.67 |      |
| GLN 407 |      |      | 0.98 |      |      |      | 0.64 |      |
| GLN 408 |      |      | 0.98 |      |      |      |      |      |
| GLN 409 |      |      | 0.93 |      |      |      |      |      |
| GLN 410 |      |      | 0.89 |      |      |      |      |      |

CC was calculated by Map to Model fit program in Phenix

## Supplementary Figures

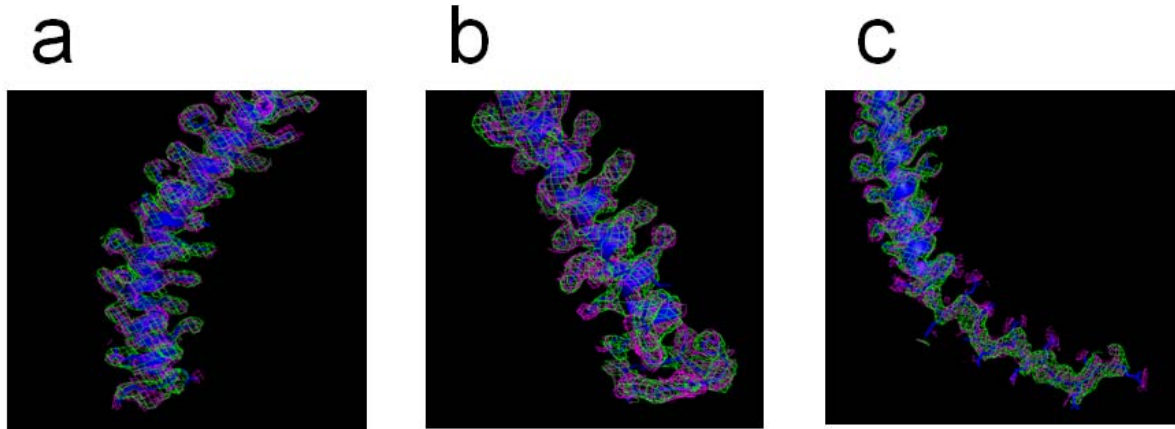

**Supplementary Fig 1. Comparison of Omit and 2Fo-Fc maps for  $\alpha$ -helical, beta and loop conformations of Htt-36Q3H.**

**a**, Omit map (pink mesh) and 2Fo-Fc map (green mesh) are overlaid with the  $\alpha$ -helical structure of Htt-polyQ (Q388-Q410) shown in blue (C1 molecule from crystal X1).

**b**, Omit map (pink mesh) and 2Fo-Fc map (green mesh) are overlaid with the  $\alpha$ -helical structure of Htt-polyQ (Q388-Q394) followed by a  $\beta$ -hairpin (Q396-Q401) shown in blue (C2 molecule from crystal X1).

**c**, Omit map (pink mesh) and 2Fo-Fc map (green mesh) are overlaid with the  $\alpha$ -helical structure of Htt-polyQ (Q388-Q394) followed by a loop (Q396-Q407) shown in blue (C1 molecule from crystal X2).
